# Supplementary material for: Structural Model Analysis of Multiple Quantitative Traits
Source: PLOS journal article supplement (doi:10.1371/journal.pgen.0020114), 2006-07-17
Supplement: S1 (10.1371/journal.pgen.0020114.s001) [file journal.pgen.0020114.s001]

Path Effect Pcorr

[Q19@](mailto:Q12@0)52A ING (-) -0.1157 -0.1564

[Q19@](mailto:Q12@0)52A **LBWT** ING (-,+) -0.0966

[Q19@](mailto:Q12@0)52D **LBWT** ING (-, +) -0.0691

# Total -0.2824

[Q17@](mailto:Q12@0)28A ING (-) -0.0902 -0.1343

[Q17@](mailto:Q17@)28A **LBWT** ING (-,+) -0.0807

# Total -0.1709

[Q2@](mailto:Q12@0)2A ING (+) 0.1301 0.1629

[Q2@](mailto:Q17@)2A **LBWT** ING (-,+) -0.0669

# Total 0.0632

[Q6@](mailto:Q12@0)46A ING (+) 0.1338 0.1695

[Q6@](mailto:Q17@)46A **LBWT** ING (-,+) -0.0829

# Total 0.0509
