# Supplementary material for: Structural Model Analysis of Multiple Quantitative Traits
Source: PLOS journal article supplement (doi:10.1371/journal.pgen.0020114), 2006-07-17
Supplement: S3 (10.1371/journal.pgen.0020114.s003) [file journal.pgen.0020114.s003]

Path Net Effect Pcorr

[Q19@](mailto:Q12@0)52A PERI (-) -0.0821 -0.1035

[Q19@](mailto:Q12@0)52A **LBWT** PERI (-,+) -0.0850

[Q19@](mailto:Q12@0)52D **LBWT** PERI (-,+) -0.0494

# Total -0.2165

[Q17@](mailto:Q12@0)28A PERI (-) -0.0865 -0.1004

[Q17@](mailto:Q17@)28A **LBWT** PERI (-,+) -0.0848

# Total -0.1713

[Q2@](mailto:Q12@0)2A PERI (+) 0.1500 0.1751

[Q2@](mailto:Q17@)2A **LBWT** PERI (-,+) -0.0517

# Total 0.0983

[Q6@](mailto:Q12@0)46A PERI (+) 0.1469 0.1828

[Q6@](mailto:Q17@)46A **LBWT** PERI (-,+) -0.0597

# Total 0.0872
